# Supplementary material for: RNAi Methodologies for the Functional Study of Signaling Molecules
Source: PLoS One. 2009 Feb 24;4(2):e4559. doi: 10.1371/journal.pone.0004559 (PMC2641016; doi:10.1371/journal.pone.0004559)
Supplement: Table S1 — Expression of selected signaling genes in RAW 264.7 cells, as assessed by Affymetrix GeneChips and RT-PCR. There were multiple probe sets in some cases. U: unavailable, P: present, A: absent, M: marginal. (0.04 MB XLS) [file pone.0004559.s001.xls]

## Sheet: Sheet1
Symbol	Gene Name	Affymetrix Calls	RT-PCR Results	Approximate Abundance	RT-PCR Results in UMRR*
ARRB1	Arrestin 2	U	P	high	P
ARRB2	Arrestin 3	P,P	P	high	P
C5aR	C5a Receptor	P	P	midium
Dgka	Diacylglycerol kinase-alpha	A	P	midium
Gab2	Growth factor receptor bound protein 2-associated protein 2	A	P	high
Gna11	G alpha 11 subunit	P	P	midium
Gna14	G alpha 14 subunit	A,A	A		P
Gna15	G alpha 15/16 subunit	A	P	high
Gnai1	G alpha i1 subunit	A	A		P
Gnai2	G alpha i2 subunit	P	P	high
Gnai3	G alpha i3 subunit	P	P	midium
Gnaq	G alpha q subunit	P	P	high
Gnb1	G beta 1 subunit	P,A,P
Gnb2	G beta 2 subunit	P	P	midium
Gnb3	G beta 3 subunit	A	A		P
Gnb4	G beta 4 subunit	P	P	midium
Gnb5	G beta 5 subunit	A,P	P	high
Gng10	G gamma 10 subunit	P
Gng11	G gamma 11 subunit	A	P	midium
Gng12	G gamma 12 subunit	P
Gng13	G gamma 13 subunit	A	A		P
Gng14	G gamma 14 subunit	P
Gng2	G gamma 2 subunit	P,A,P	P	low
Gng3	G gamma 3 subunit	A	A		P
Gng4	G gamma 4 subunit	A,A,A	A		A
Gng5	G gamma 5 subunit	P,P,A	P	midium
Gng7	G gamma 7 subunit	A	P	low	P
Gng8	G gamma 8 subunit	A	P	midium
GRK 5	G protein-coupled receptor kinase 5	M,P
Grk1	G protein-coupled receptor kinase 1	A	P	low
Grk2	G protein-coupled receptor kinase 2	P	P	midium
Grk3	G protein-coupled receptor kinase 3	U	A		P
Grk4	G protein-coupled receptor kinase 4	A,A	P	midium
Hck	Hemopoietic cell kinase	P
Inpp5a	Inositol 5-phosphatase type I	P
Ip3r3	Inositol phosphate 3 receptor 3	P
Itpka	Inositol 1,4,5-trisphosphate 3-kinase, type A	A	A		P
Itpkb	Inositol 1,4,5-trisphosphate 3-kinase, type B	P
Itpkc	Inositol 1,4,5-trisphosphate 3-kinase, type C	A,A	P	midium	P
Itpr2	Inositol phosphate 3 receptor 2	A,A	P	high
P2rx7	Nucleotide receptor P2x7	P,P
P2ry1	Nucleotide receptor P2y1	A	P	midium	P
P2ry2	Nucleotide receptor P2y2 UTP	A	P	midium
P2ry4	Nucleotide receptor P2y4 UTP	A	A		P
P2ry5	Nucleotide receptor P2y5	P
P2ry6	Nucleotide receptor P2y6 UTP	P	P	high
PI 3-K p101	Phosphoinositide 3-kinase p101 class Ib regulatory subunit	P	P	low
PI 3-K p110alpha	Phosphoinositide 3-kinase p110 alpha, class Ia catalytic subunit	P,P
PI 3-K p110beta	Phosphoinositide 3-kinase p110 beta, class Ia catalytic subunit	P	P	high
PI 3-K p110delta	Phosphoinositide 3-kinase p110 delta, class Ia catalytic subunit	P,P,A,P,P	P	midium
PI 3-K p85beta	Phosphoinositide 3-kinase p85 beta regulatory subunit	P	P	midium
PIK3C3	Phosphoinositide 3-kinase class III catalytic subunit	P
PIK3R4	Phosphoinositide 3-kinase class III regulatory subunit	P
Plcb1	Phospholipase C beta 1	A,A,A,A	A		P
Plcb2	Phospholipase C beta 2	U	P	low
Plcb3	Phospholipase C beta 3	P
Plcb4	Phospholipase C beta 4	P,A,P
Plcg1	Phospholipase C gamma 1	A,P	P	midium
Plcg2	Phospholipase C gamma 2	P
Pld1	Phospholipase D type 1	A,P,A
PMCA1	Plasma membrane calcium transporting ATPase isoform 1	P,P,P
PMCA2	Plasma membrane calcium transporting ATPase isoform 2	A,A,A	A		P
PMCA3	Plasma membrane calcium transporting ATPase isoform 3	P
PMCA4	Plasma membrane calcium transporting ATPase isoform 4	U	P	high	P
Prkca	protein kinase C, alpha	A,A	P	low	P
Prkcb	protein kinase C, beta	A,A	A		P
Prkcc	protein kinase C, gamma	A,P	A		A
Prkce	protein kinase C, epsilon	P,A,A	A		P
Prkcq	protein kinase C, theta	A	A		A
Pten	Phosphatase and tensin homolog deleted on chromosome ten	P	P	high
Rac2	Ras-related C3 botulinum toxin substrate 2	P,P
Rac3	Ras-related C3 botulinum toxin substrate 3	A	A		P
Rgs13	regulator of G protein signaling 13	A	P	low	P
Rgs16	regulator of G protein signaling 16	A,A,A	P	high
Rgs19	regulator of G protein signaling 19	P,P	P	high	P
Rgs4	regulator of G protein signaling 4	A,A,A	A		P
Rgs7	regulator of G protein signaling 7	A	A		P
Rgs8	regulator of G protein signaling 8	U	P	medium	P
RhoA	Ras homolog gene family, member A	P,P
SERCA1	SR calcium pump SERCA1	A	A		P
SERCA3	SR calcium pump SERCA3	A,P
SHIP2	SH2-containing inositol 5-phosphatase 2	P
SHP2	SH2-containing phosphotyrosine phosphatase 2	P,A
Trpc5	transient receptor potential cation channel, subfamily C, member 5	P	A		A
*Universal Mouse Reference RNA (11 cell line mixture)
